# Supplementary material for: The added value of PSMA PET/MR radiomics for prostate cancer staging
Source: PubMed Central journal article supplement (PMC8803696; doi:10.1007/s00259-021-05430-z), 2021-07-13
Supplement: 259_2021_5430_MOESM1_ESM.pdf [file 259_2021_5430_MOESM1_ESM.pdf]

**Article title: The added value of PSMA PET/MR radiomics for prostate cancer staging****Journal:** European Journal of Nuclear Medicine and Molecular Imaging**Authors:** Solari EL, Gafita A, Schachoff S, Bogdanović B, Villagrán Asiares A, Amiel T, Hui W, Rauscher I, Visvikis D, Maurer T, Schwamborn K, Mustafa M, Weber W, Navab N, Eiber M, Hatt M, Nekolla SG

|                             | <b>PET</b>                                                                                                                        | <b>T1w</b>                                 | <b>T2w</b>                                     | <b>ADC map</b>                   |
|-----------------------------|-----------------------------------------------------------------------------------------------------------------------------------|--------------------------------------------|------------------------------------------------|----------------------------------|
| <b>Image description</b>    | <sup>68</sup> Ga-PSMA-11 image (with MLAA-based attenuation correction OP-OSEM reconstruction)                                    | T1 weighted FSE (TR: 600, TE: 8.7, ETL: 5) | T2 weighted SPACE (TR: 1700, TE: 102, ETL: 89) | ADC map (b-values: 50, 400, 800) |
| <b>Rows x Columns</b>       | 172x172                                                                                                                           | 264x384                                    | 320x320                                        | 136x160                          |
| <b>Pixel size [mm]</b>      | 4.17 / 4.17                                                                                                                       | 1.17 / 1.17                                | 0.72 / 0.72                                    | 1.63 / 1.63                      |
| <b>Slices</b>               | 418-516                                                                                                                           | 40                                         | 72                                             | 20                               |
| <b>Slice thickness [mm]</b> | 2.03                                                                                                                              | 6.50                                       | 1.00                                           | 3.60                             |
| <b>Corrections</b>          | detector normalization, dead time, attenuation through MLAA, 3D scatter (model based), decay, delayed event subtraction (randoms) |                                            |                                                |                                  |
| <b>Filter</b>               | 4mm Gauss XYZ                                                                                                                     |                                            |                                                |                                  |

**Supplementary Table 1.** Image characteristics of the acquired PET and MR studies.

**Corresponding author: Esteban Lucas Solari.** Technical University Munich, School of Medicine, Department of Nuclear Medicine, Munich, Germany.  
Contact: elucas.solari@tum.de
